# Supplementary material
Source: publisher site journal article supplement (https://www.dovepress.com/article/201007)
Supplement: Supplementary file 1 [file get_supplementary_file.php]

**Table S1** Minor allele frequencies of pharmacogene variants

| Gene | dbSNP | Chr. position  (GRCh38) | Effect | Number of observed het subjects | Number of expected het subjects | HWE  *p* value | MAF  (N=102 alleles) |
| --- | --- | --- | --- | --- | --- | --- | --- |
| *CYP1A2* |  |  |  |  |  |  |  |
| g.-3860G>A | rs2069514 | 15:74745879 | upstream variant | 0.39 | 0.42 | 0.880 | 0.29 |
| g.-729C>T | rs12720461 | 15:74749010 | upstream variant | 0 | 0 | 0 | 0.00 |
| g.-163C>A | rs762551 | 15:74749576 | upstream variant | 0.43 | 0.38 | 0.611 | 0.26 |
| g.558C>A | rs72547513 | 15:74750296 | F186L | 0 | 0 | 0 | 0.00 |
| g.3533G>A | rs56107638 | 15:74753271 | splicing defect | 0 | 0 | 0 | 0.00 |
| *CYP2B6* |  |  |  |  |  |  |  |
| c.64C>T | rs8192709 | 19:40991369 | R22C | 0.04 | 0.04 | 1.000 | 0.02 |
| c.516G>T | rs3745274 | 19:41006936 | Q172H | 0.49 | 0.49 | 1.000 | 0.42 |
| c.785A>G | rs2279343 | 19:41009358 | K262R | 0.47 | 0.50 | 0.885 | 0.45 |
| c.983T>C | rs28399499 | 19:41012316 | I328T | 0 | 0 | 0 | 0.00 |
| *CYP2C9* |  |  |  |  |  |  |  |
| c.269T>C | rs72558187 | 10:94941958 | L90P | 0 | 0 | 0 | 0.00 |
| c.430C>T | rs1799853 | 10:94942290 | R144C | 0 | 0 | 0 | 0.00 |
| c.449G>A | rs7900194 | 10:94942309 | R150H | 0 | 0 | 0 | 0.00 |
| c.485C>A | rs72558190 | 10:94947782 | S162X | 0 | 0 | 0 | 0.00 |
| c.818delA | rs9332131 | 10:94949282 | 273frameshift | 0 | 0 | 0 | 0.00 |
| c.1003C>T | rs28371685 | 10:94981224 | R335W | 0 | 0 | 0 | 0.00 |
| c.1075A>C | rs1057910 | 10:94981296 | I359L | 0.06 | 0.09 | 0.195 | 0.05 |
| c.1076T>C | rs56165452 | 10:94981297 | I359T | 0 | 0 | 0 | 0.00 |
| c.1080C>G | rs28371686 | 10:94981301 | D360E | 0 | 0 | 0 | 0.00 |
| c.1465C>T | rs9332239 | 10:94989020 | P489S | 0 | 0 | 0 | 0.00 |
| *CYP2C19* |  |  |  |  |  |  |  |
| g.-806C>T | rs12248560 | 10:94761900 | upstream variant | 0 | 0 | 0 | 0.00 |
| c.1A>G | rs28399504 | 10:94762706 | M1V | 0 | 0 | 0 | 0.00 |
| c.358T>C | rs41291556 | 10:94775416 | W120R | 0 | 0 | 0 | 0.00 |
| c.395G>A | rs72552267 | 10:94775453 | R132Q | 0 | 0 | 0 | 0.00 |
| c.636G>A | rs4986893 | 10:94780653 | W212X | 0.10 | 0.09 | 1.000 | 0.05 |
| c.681G>A | rs4244285 | 10:94781859 | splicing defect | 0.35 | 0.40 | 0.579 | 0.28 |
| g.19294T>A | rs72558186 | 10:94781999 | splicing defect | 0 | 0 | 0 | 0.00 |
| c.1297C>T | rs56337013 | 10:94852738 | R433W | 0.02 | 0.02 | 1.000 | 0.01 |
| *CYP2D6* |  |  |  |  |  |  |  |
| g.4180G>C | rs1135840 | 22:42126611 | S486T | 0.18 | 0.39 | 5x10-4 | 0.27 |
| g.4155C>T | rs28371735 | 22:42126636 | H478Y | 0 | 0 | 0 | 0.00 |
| g.3183G>A | rs59421388 | 22:42127608 | V338M | 0 | 0 | 0 | 0.00 |
| g.2988G>A | rs28371725 | 22:42127803 | splicing defect | 0.12 | 0.11 | 1.000 | 0.06 |
| g.2935A>C | rs5030867 | 22:42127856 | H324P | 0 | 0 | 0 | 0.00 |
| g.2850C>T | rs16947 | 22:42127941 | R296C | 0.36 | 0.46 | 0.188 | 0.36 |
| g.2615_2617delA AG | rs5030656 | 22:42128174 | K281del | 0 | 0 | 0 | 0.00 |
| g.2549delA | rs35742686 | 22:42128242 | 259frameshift | 0 | 0 | 0 | 0.00 |
| g.2539_2542del AACT | rs72549353 | 22:42128249 | 255frameshift | 0 | 0 | 0 | 0.00 |
| g.1973_1974insG | rs72549354 | 22:42128817 | 211frameshift | 0 | 0 | 0 | 0.00 |
| g.1846G>A | rs3892097 | 22:42128945 | splicing defect | 0.02 | 0.02 | 1.000 | 0.01 |
| g.1758G>T | rs5030865 | 22:42129033 | G169X | 0 | 0 | 0 | 0.00 |
| g.1707delT | rs5030655 | 22:42129084 | 118frameshift | 0 | 0 | 0 | 0.00 |
| g.1023C>T | rs28371706 | 22:42129770 | T107I | 0 | 0 | 0 | 0.00 |
| g.124G>A | rs5030862 | 22:42130668 | G42R | 0 | 0 | 0 | 0.00 |
| g.100C>T | rs1065852 | 22:42130692 | P34S | 0.34 | 0.47 | 0.091 | 0.37 |
| g.883G>C | rs201377835 | 22:42129910 | splicing defect | 0 | 0 | 0 | 0.00 |
| g.137_138insT | rs774671100 | 22:42130655 | 47frameshift | 0 | 0 | 0 | 0.00 |
| g.4125_4133dupGTGCCCACT | hCV32407220 | 22:42126667 | 468_470dupVPT | 0 | 0 | 0 | 0.00 |
| *CYP3A4* |  |  |  |  |  |  |  |
| c.878T>C | rs28371759 | 7:99764003 | L292P | 0 | 0 | 0 | 0.00 |
| c.664T>C | rs55785340 | 7:99768360 | S222P | 0 | 0 | 0 | 0.00 |
| c.566T>C | rs4987161 | 7:99768458 | F189S | 0 | 0 | 0 | 0.00 |
| g.15389C>T | rs35599367 | 7:99768693 | intron variant | 0 | 0 | 0 | 0.00 |
| c.-392A>G | rs2740574 | 7:99784473 | upstream variant | 0.04 | 0.04 | 1.000 | 0.02 |
| *CYP3A5* |  |  |  |  |  |  |  |
| g.27289C>A | rs28365083 | 7:99652613 | T398N | 0 | 0 | 0 | 0.00 |
| g.27131_27132insT | rs41303343 | 7:99652770 | 346frameshift | 0 | 0 | 0 | 0.00 |
| g.6986A>G | rs776746 | 7:99672916 | splicing defect | 0.37 | 0.39 | 0.963 | 0.27 |
| *COMT* |  |  |  | 0 | 0 | 0 |  |
| c.322G>A | rs4680 | 22:19963748 | V158M | 0.49 | 0.44 | 0.648 | 0.32 |
| *SULT1A1* |  |  |  |  |  |  |  |
| c.638G>A | rs9282861 | 16:28606193 | R213H | 0.10 | 0.09 | 1.000 | 0.05 |
| *SULT4A1* |  |  |  |  |  |  |  |
| *1113A>G | rs763120 | 22:43826487 | intron variant | 0.37 | 0.39 | 0.963 | 0.27 |
| *UGT2B7* |  |  |  |  |  |  |  |
| c.-161C>T | rs7668258 | 4:69096360 | upstream variant | 0.41 | 0.39 | 1.000 | 0.27 |
| c.211G>T | rs12233719 | 4:69096731 | A71S | 0.08 | 0.08 | 1.000 | 0.04 |
| c.372A>G | rs28365063 | 4:69096892 | R124R | 0.33 | 0.37 | 0.665 | 0.25 |
| c.802C>T | rs7439366 | 4:69098620 | Y268H | 0.41 | 0.39 | 1.000 | 0.27 |
| *ABCB1* |  |  |  |  |  |  |  |
| c.3435C>T | rs1045642 | 7:87509329 | I1145I | 0.51 | 0.50 | 1.000 | 0.49 |
| c.2677G>T/A | rs2032582 | 7:87531302 | S893T/A | 0 | 0 | 0 | 0 |
| c.1236C>T | rs1128503 | 7:87550285 | G412G | 0.26 | 0.28 | 0.812 | 0.17 |
| *ABCA1* |  |  |  |  |  |  |  |
| c.4760A>G | rs2230808 | 9:104800523 | K1587R | 0.67 | 0.50 | 0.040 | 0.49 |
| c.2649A>G | rs2066714 | 9:104824472 | I883M | 0.65 | 0.49 | 0.058 | 0.44 |
| *ABCC2* |  |  |  |  |  |  |  |
| c.-24C>T | rs717620 | 10:99782821 | upstream variant | 0.28 | 0.27 | 1.000 | 0.16 |
| c.3972C>T | rs3740066 | 10:99844450 | I1324I | 0.45 | 0.37 | 0.256 | 0.25 |
| g.68231A>G | rs3740065 | 10:99845936 | intron variant | 0.39 | 0.32 | 0.196 | 0.20 |
| *ABCC4* |  |  |  |  |  |  |  |
| c.2269G>A | rs3765534 | 13:95163161 | E757K | 0.33 | 0.28 | 0.404 | 0.17 |
| c.912C>A | rs2274407 | 13:95206781 | K304N | 0.12 | 0.15 | 0.513 | 0.08 |
| *ABCG2* |  |  |  |  |  |  |  |
| c.421C>A | rs2231142 | 4:88131171 | Q141K | 0.29 | 0.30 | 1.000 | 0.19 |
| *SLCO1B1* |  |  |  |  |  |  |  |
| g.37041T>C | rs4149056 | 12:21178615 | V174A | 0.08 | 0.08 | 1.000 | 0.04 |
| *SLC25A40* |  |  |  |  |  |  |  |
| g.87868008C/G | rs10239908 | 7:87868008 | intron variant | 0.08 | 0.11 | 0.288 | 0.06 |

**Abbreviations:** het, heterozygous subjects (n=51); HWE, Hardy-Weinberg Equilibrium; MAF, Minor Allele Frequency

**Table S2** SNP frequencies of drug metabolizing genes between relapse and non-relapse groups

| Gene | Genotype | | N (%) | | Association test | | OR (95% CI) | *P value* |
| --- | --- | --- | --- | --- | --- | --- | --- | --- |
|  |  | |  | | **Relapse** | **Non-relapse** |  |  |
|  |  | | **(N=51)** | | **(n=4)** | **(n=47)** |  |  |
| *CYP1A2* |  | |  | |  |  |  |  |
| g.-3860G>A | G/G | | 26 (51.0) | | 1 | 25 | - | 0.296* |
| rs2069514 | G/A | | 20 (39.2) | | 2 | 18 | 1.61 (0.21-12.47) | 0.640 |
|  | A/A | | 5 (9.8) | | 1 | 4 | 3.58 (0.30-42.97) | 0.347 |
|  | G/A+A/A | | 25 (49.0) | | 3 | 22 | 3.41 (0.33-35.20) | 0.350 |
|  | G | | 72 (70.6) | | 4 | 68 | - |  |
|  | A | | 30 (29.4) | | 4 | 26 | 2.62 (0.45-15.00) | 0.183 |
| g.-163C>A | C/C | | 2 (3.9) | | 0 | 2 | - | 1.000* |
| rs762551 | C/A | | 22 (43.1) | | 2 | 20 | 1.35 (0.18-10.42) | 1.000 |
|  | A/A | | 27 (52.9) | | 2 | 25 | 0.88 (0.11-6.78) | 1.000 |
|  | C/A+A/A | | 49 (96.1) | | 4 | 45 | 0.33 (0.028-3.76) | 0.379 |
|  | C | | 26 (25.5) | | 2 | 24 | - |  |
|  | A | | 76 (74.5) | | 6 | 70 | 1.03 (0.17-11.08) | 0.974 |
| *CYP2B6* |  | |  | |  |  |  |  |
| c.64C>T | C/C | | 49 (96.1) | | 4 | 45 | - |  |
| rs8192709 | C/T | | 2 (3.9) | | 0 | 2 | 3.07 (0.27-35.33) | 0.379* |
|  | C | | 100 (98.0) | | 8 | 92 | - |  |
|  | T | | 2 (2.0) | | 0 | 2 | 3.44 (0.32-36.64) | 0.331 |
| c.516G>T | G/G | | 17 (33.3) | | 2 | 15 | - | 0.816 |
| rs3745274 | G/T | | 25 (49.0) | | 2 | 23 | 1.04 (0.14-8.04) | 1.000 |
|  | T/T | | 9 (17.7) | | 0 | 9 | 0.78 (0.08-7.45) | 1.000 |
|  | G/T+T/T | | 34 (66.7) | | 2 | 32 | 0.47 (0.06-3.66) | 0.593 |
|  | G | | 59 (57.8) | | 6 | 53 | - |  |
|  | T | | 43 (42.2) | | 2 | 41 | 0.43 (0.04-2.59) | 0.306 |
| c.785A>G | A/A | | 16 (31.4) | | 1 | 15 | - | 1.000* |
| rs2279343 | A/G | | 24 (47.1) | | 2 | 22 | 1.136 (0.147-8.76) | 1.000 |
|  | G/G | | 11 (21.6) | | 1 | 10 | 1.23 (0.12-13.17) | 1.000 |
|  | A/G+G/G | | 35 (68.6) | | 3 | 32 | 1.41 (0.14-14.67) | 1.000 |
|  | A | | 56 (54.9) | | 4 | 52 | - |  |
|  | G | | 46 (45.1) | | 4 | 42 | 1 (0.18-5.67) | 0.772 |
| *CYP2C9* |  | |  | |  |  |  |  |
| c.1075A>C | A/A | | 47 (92.2) | | 4 | 43 | - | 1.000* |
| rs1057910 | A/C | | 3 (5.9) | | 0 | 3 | 2.25 (0.209-24.27) | 0.452 |
|  | C/C | | 1 (2.0) | | 0 | 1 | 4.70 (0.359-61.50) | 0.298 |
|  | A/C+C/C | | 4 (7.8) | | 0 | 4 | 1.76 (0.17-18.23) | 0.518 |
|  | A | | 97 (95.1) | | 8 | 89 | ref. |  |
|  | C | | 5 (4.9) | | 0 | 5 | 1.67 (0.18-15.43) | 0.511 |
| *CYP2C19* |  | |  | |  |  |  |  |
| c.636G>A | G/G | | 46 (90.2) | | 4 | 42 | - |  |
| rs4986893 | G/A | | 5 (9.8) | | 0 | 5 | 1.43 (0.14-14.45) | 0.577* |
|  | G | | 97 (95.1) | | 8 | 89 | ref. |  |
|  | A | | 5 (4.9) | | 0 | 5 | 1.67 (0.18-15.43) | 0.511 |
| c.1297C>T | C/C | | 50 (98.0) | | 4 | 46 | - |  |
| rs56337013 | C/T | | 1 (2.0) | | 0 | 1 | 4.70 (0.36-61.50) | 0.298* |
|  | C | | 101 (99.0) | | 8 | 93 | ref. |  |
|  | T | | 1 (1.0) | | 0 | 1 | 5.22 (0.43-63.36) | 0.259 |
| *CYP2D6* |  | |  | |  |  |  |  |
| g.2988G>A | G/G | | 44 (86.3) | | 4 | 40 | - | 1.000* |
| rs28371725 | G/A | | 6 (11.8) | | 0 | 6 | 1.20 (0.12-11.87) | 1.000 |
|  | ND | | 1 (2.0) | | 0 | 1 | - | - |
|  | G | | 94 (94.0) | | 8 | 86 | - |  |
|  | A | | 6 (6.0) | | 0 | 6 | 1.38 (0.15-12.52) | 0.568 |
| g.2850C>T | C/C | | 23 (45.1) | | 2 | 21 | - | 0.836* |
| rs16947 | C/T | | 18 (35.3) | | 2 | 16 | 2.38 (0.31-18.36) | 0.581 |
|  | T/T | | 9 (17.7) | | 0 | 9 | 0.78 (0.08-7.45) | 1.000 |
|  | ND | | 1 (2.0) | | 0 | 1 | - | - |
|  | C/T+T/T | | 27 (52.9) | | 2 | 25 | 0.88 (0.11-6.78) | 1.000 |
|  | C | | 64 (6) | | 6 | 58 | - |  |
|  | T | | 36 (36.0) | | 2 | 34 | 0.57 (0.05-3.43) | 0.499 |
| g.1846G>A | G/G | | 50 (98.0) | | 4 | 46 | - |  |
| rs3892097 | G/A | | 1 (2.0) | | 0 | 1 | 0.21 (0.02-2.78) | 0.298* |
|  | G | | 101 (99.0) | | 8 | 93 | - | 0.259 |
|  | A | | 1 (1.0) | | 0 | 1 | 5.22 (0.43-63.36) |  |
| g.100C>T | C/C | | 23 (45.1) | | 1 | 22 | - | 0.690* |
| rs1065852 | C/T | | 17 (33.3) | | 2 | 15 | 2.13 (0.27-16.63) | 0.593 |
|  | T/T | | 10 (19.6) | | 1 | 9 | 1.41 (0.13-15.16) | 1.000 |
|  | ND | | 1 (2.0) | | - | 1 | - | - |
|  | C/T+T/T | | 27 (52.9) | | 3 | 24 | 2.88 (0.28-29.68) | 0.612 |
|  | C | | 37 (37.0) | | 4 | 33 | - |  |
|  | T | | 63 (63.0) | | 4 | 59 | 0.56 (0.10-3.23) | 0.427 |
| *CYP3A4* |  | |  | |  |  |  |  |
| c.-392A>G | A/A | | 49 (96.1) | | 4 | 45 | - |  |
| rs2740574 | A/G | | 2 (3.9) | | 0 | 2 | 3.07 (0.27-35.33) | 0.379* |
|  | A | | 100 (98.0) | | 8 | 92 | - |  |
|  | G | | 2 (2.0) | | 0 | 2 | 3.44 (0.32-36.64) | 0.331 |
| *CYP3A5* |  | |  | |  |  |  |  |
| g.6986A>G | A/A | | 4 (7.8) | | 1 | 3 | - | 0.492* |
| rs776746 | A/G | | 19 (37.3) | | 1 | 18 | 0.54 (0.05-5.57) | 1.000 |
|  | G/G | | 28 (54.9) | | 2 | 26 | 0.81 (0.11-6.23) | 1.000 |
|  | A/G+G/G | | 47 (92.2) | | 3 | 44 | 0.21 (0.02-2.61) | 0.286 |
|  | A | | 27 (26.5) | | 3 | 24 | - |  |
|  | G | | 75 (73.5) | | 5 | 70 | 0.57 (0.10-3.98) | 0.461 |
| *COMT* |  | |  | |  |  |  |  |
| c.322G>A | G/G | | 22 (43.1) | | 3 | 19 | - | 0.520* |
| rs4680 | G/A | | 25 (49.0) | | 1 | 24 | 0.32 (0.03-3.30) | 0.610 |
|  | A/A | | 4 (7.8) | | 0 | 4 | 1.76 (0.17-18.23) | 0.518 |
|  | G/A+A/A | | 29 (56.9) | | 1 | 28 | 0.23 (0.02-2.34) | 0.303 |
|  | G | | 69 (67.7) | | 7 | 62 | - |  |
|  | A | | 33 (32.4) | | 1 | 32 | 0.28 (0.01-2.33) | 0.211 |
| *SULT1A1* |  | |  | |  |  |  |  |
| c.638G>A | G/G | | 46 (90.2) | | 4 | 42 | - |  |
| rs9282861 | G/A | | 5 (9.8) | | 0 | 5 | 1.43 (0.14-14.45) | 0.577* |
|  | G | | 97 (95.1) | | 8 | 89 | - |  |
|  | A | | 5 (4.9) | | 0 | 5 | 1.68 (0.18-15.43) | 0.511 |
| *SULT4A1* |  | |  | |  |  |  |  |
| *1113A>G | A/A | | 28 (54.9) | | 2 | 26 | - | 0.492* |
| rs763120 | A/G | | 19 (37.3) | | 1 | 18 | 0.54 (0.05-5.57) | 1.000 |
|  | G/G | | 4 (7.8) | | 1 | 3 | 4.89 (0.38-62.46) | 0.286 |
|  | A/G+G/G | | 23 (45.1) | | 2 | 21 | 1.24 (0.161-9.55) | 1.000 |
|  | A | | 75 (73.5) | | 5 | 70 | - |  |
|  | G | | 27 (26.5) | | 3 | 24 | 1.75 (0.25-9.74) | 0.461 |
| *UGT2B7* |  | |  | |  |  |  |  |
| c.-161C>T | C/C | | 27 (52.9) | | 2 | 25 | - | 1.000* |
| rs7668258 | C/T | | 21 (41.2) | | 2 | 19 | 1.47 (0.19-11.39) | 1.000 |
|  | T/T | | 3 (5.9) | | 0 | 3 | 2.25 (0.21-24.27) | 0.452 |
|  | C/T+T/T | | 24 (47.1) | | 2 | 22 | 1.14 (0.15-8.76) | 1.000 |
|  | C | | 75 (73.5) | | 6 | 69 | - |  |
|  | T | | 27 (26.5) | | 2 | 25 | 0.92 (0.087-5.59) | 0.922 |
| c.211G>T | G/G | | 47 (92.2) | | 4 | 43 | - | 1.000* |
| rs12233719 | G/T | | 4 (7.8) | | 0 | 4 | 1.76 (0.17-18.23) | 0.518 |
|  | G/T+T/T | | 4 (7.8) | | 0 | 4 |  |  |
|  | G | | 98 (96.1) | | 8 | 90 | - |  |
|  | T | | 4 (3.9) | | 0 | 4 | 2.02 (0.21-19.26) | 0.457 |
| c.802C>T | C/C | | 29 (53.7) | | 2 | 25 | - | 1.000* |
| rs7439366 | C/T | | 22 (40.7) | | 2 | 19 | 1.47 (0.19-11.39) | 1.000 |
|  | T/T | | 3 (5.6) | | 0 | 3 | 2.25 (0.21-24.27) | 0.452 |
|  | C/T+T/T | | 25 (49.0) | | 2 | 22 | 1.14 (0.15-8.76) | 1.000 |
|  | C | | 75 (73.5) | | 6 | 69 | - |  |
|  | T | | 27 (26.5) | | 2 | 25 | 0.92 (0.09-5.59) | 0.922 |
| *ABCB1* | |  | |  |  |  |  |  |
| c.1236C>T | | C/C | | 2 (3.9) | 0 | 2 | - | 0.393* |
| rs1128503 | | C/T | | 13 (25.5) | 2 | 11 | 3.27 (0.41-26.01) | 0.266 |
|  | | T/T | | 36 (70.6) | 2 | 34 | 0.38 (0.05-3.01) | 0.571 |
|  | | C/T+T/T | | 49 (96.1) | 4 | 45 | 0.33 (0.03-3.76) | 0.379 |
|  | | C | | 17 (16.67) | 2 | 15 | - |  |
|  | | T | | 85 (83.33) | 6 | 79 | 0.57 (0.09-6.33) | 0.510 |
| c.2677G>T/A | | G/G | | 11 (21.57) | 2 | 9 | - | 0.428* |
| rs2032582 | | G/T | | 25 (49.02) | 1 | 24 | 0.24 (0.03-1.92) | 0.199 |
|  | | T/T | | 13 (25.49) | 1 | 12 | all variants vs. GG |  |
|  | | A/T | | 1 (1.96) | 0 | 1 |  |  |
|  | | A/A | | 1 (1.96) | 0 | 1 |  |  |
|  | | G | | 51 (47.2) | 5 | 46 | - |  |
|  | | T | | 54 (5) | 3 | 51 | 0.58 (0.13-2.54) | 0.716 |
|  | | A | | 3 (2.8) | 0 | 3 | 2.72 (0.27-27.02) | 0.379 |
| c.3435C>T | | C/C | | 13 (25.5) | 2 | 11 | - | 0.436* |
| rs1045642 | | C/T | | 26 (51.0) | 1 | 25 | 0.29 (0.03-3.03) | 0.350 |
|  | | T/T | | 12 (23.5) | 1 | 11 | 1.09 (0.10-11.57) | 1.000 |
|  | | C/T+T/T | | 38 (74.5) | 2 | 36 | 0.31 (0.04-2.43) | 0.266 |
|  | | C | | 52 (51.0) | 5 | 47 | - |  |
|  | | T | | 50 (49.0) | 3 | 47 | 0.60 (0.09-3.30) | 0.497 |
| *ABCA1* | |  | |  |  |  |  |  |
| c.2649A>G | | A/A | | 6 (11.8) | 0 | 6 | - | 1.000* |
| rs2066714 | | A/G | | 33 (64.7) | 3 | 30 | 1.70 (0.16-17.65) | 1.000 |
|  | | G/G | | 12 (23.5) | 1 | 11 | 1.20 (0.12-11.87) | 1.000 |
|  | | A/G+G/G | | 45 (88.2) | 4 | 41 | 0.92 (0.086-9.73) | 1.000 |
|  | | A | | 45 (44.1) | 3 | 42 | - |  |
|  | | G | | 57 (55.9) | 5 | 52 | 1.67 (0.30-11.36) | 0.499 |
| *ABCC2* | |  | |  |  |  |  |  |
| c.-24C>T | | C/C | | 36 (70.6) | 4 | 32 | - | 0.600* |
| rs717620 | | C/T | | 14 (27.5) | 0 | 14 | 0.45 (0.05-4.22) | 0.660 |
|  | | T/T | | 1 (2.0) | 0 | 1 | 4.70 (0.36-61.50) | 0.298 |
|  | | C/T+T/T | | 15 (29.4) | 0 | 15 | 0.41 (0.04-3.83) | 0.654 |
|  | | C | | 86 (84.3) | 8 | 78 | - |  |
|  | | T | | 16 (15.7) | 0 | 16 | 0.52 (0.06-4.35) | 1.000 |
| c.3972C>T | | C/C | | 27 (52.9) | 4 | 23 | - | 0.184* |
| rs3740066 | | C/T | | 23 (45.1) | 0 | 23 | 0.21 (0.02-1.92) | 0.204 |
|  | | T/T | | 1 (2.0) | 0 | 1 | 0.21 (0.02-1.92) | 0.204 |
|  | | C/T+T/T | | 24 (47.1) | 0 | 24 | 0.19 (0.02-1.77) | 0.197 |
|  | | C | | 77 (75.5) | 8 | 69 | - |  |
|  | | T | | 25 (24.5) | 0 | 25 | 0.30 (0.04-2.48) | 0.446 |
| g.68231A>G | | A/A | | 31 (60.8) | 1 | 30 | - |  |
| rs3740065 | | A/G | | 20 (39.2) | 3 | 17 | 5.29 (0.51-54.96) | 0.287 |
|  | | A | | 82 (80.4) | 5 | 77 | - |  |
|  | | G | | 20 (19.6) | 3 | 17 | 2.72 (0.32-15.41) | 0.184 |
| *ABCC4* | |  | |  |  |  |  |  |
| c.912C>A | | C/C | | 44 (86.3) | 3 | 41 | - | 0.457* |
| rs2274407 | | C/A | | 6 (11.8) | 1 | 5 | 2.80 (0.24-32.31) | 0.404 |
|  | | A/A | | 1 (2.0) | 0 | 1 | 4.70 (0.36-61.50) | 0.298 |
|  | | C/A+A/A | | 7 (13.0) | 1 | 6 | 2.28 (0.20-25.61) | 0.457 |
|  | | C | | 94 (92.2) | 7 | 87 | - |  |
|  | | A | | 8 (7.8) | 1 | 7 | 1.78 (0.04-17.56) | 0.610 |
| c.2269G>A | | G/G | | 34 (66.7) | 3 | 31 | - |  |
| rs3765534 | | G/A | | 17 (33.3) | 1 | 16 | 0.65 (0.06-6.72) | 1.000* |
|  | | G | | 85 (83.3) | 7 | 78 | - |  |
|  | | A | | 17 (16.7) | 1 | 16 | 0.70 (0.01-6.09) | 0.742 |
| *SLCO1B1* | |  | |  |  |  |  |  |
| g.37041T>C | | T/T | | 47 (92.2) | 3 | 44 | - |  |
| rs4149056 | | T/C | | 4 (7.8) | 1 | 3 | 4.89 (0.38-62.46) | 0.286* |
|  | | T | | 98 (96.1) | 7 | 91 | - |  |
|  | | C | | 4 (3.9) | 1 | 3 | 4.33 (0.07-61.52) | 0.193 |
| *SLC25A40* | |  | |  |  |  |  |  |
| g.87868008C>G | | C/C | | 46 (90.2) | 4 | 42 | - | 1.000* |
| rs10239908 | | C/G | | 4 (7.8) | 0 | 4 | 1.77 (0.17-18.23) | 0.518 |
|  | | G/G | | 1 (2.0) | 0 | 1 | 4.70 (0.36-61.50) | 0.298 |
|  | | C/G+G/G | | 5 (9.8) | 0 | 5 | 1.43 (0.14-14.45) | 0.577 |
|  | | C | | 96 (94.1) | 8 | 88 | - |  |
|  | | G | | 6 (5.9) | 0 | 6 | 1.41 (0.16-12.81) | 0.560 |

**Notes:** reference was compared to others when sub-analysis; *overall *p*-value

**Abbreviations:** OR, odds ratio; 95% CI, 95% confidence interval; ref, reference

**Table S3** The relationship between the composite CYP2D6 and CYP2C19 activity score and primaquine response

| Activity Score | Genotype | N (%) | Association test | | OR (95% CI) | *p value* |
| --- | --- | --- | --- | --- | --- | --- |
|  |  |  | **Relapse** | **Non-relapse** |  |  |
|  |  | **(N=51)** | **(n=4)** | **(n=47)** |  |  |
| *CYP2D6* |  |  |  |  |  |  |
| 0 | **5/*5* | 1 (2.0) | 0 | 1 | - | 0.569** |
| 0.5 | **4/*10*, **5/*10* | 2 (3.9) | 0 | 2 | - |  |
| 1 | **1/*5*, **10/*10*, **10/*41* | 14 (27.5) | 2 | 12 | - |  |
| 1.5 | **1/*10*, **2/*10*, **1/*41*, **2/*41* | 19 (37.3) | 2 | 17 | - |  |
| 2 | **1/*1*, **2/*2* | 15 (29.4) | 0 | 15 | - |  |
| Others vs. 2 |  |  | 4 | 32 | 2.42 (0.26-22.51) | 0.654 |
| 1+1.5 vs. others |  |  | 4 | 29 | 3.17 (0.34-29.23) | 0.399 |
| *CYP2C19* |  |  |  |  |  |  |
| 0 | **2/*2*, **2/*3* | 6 (11.8) | 1 | 5 | - | 0.165** |
| 1 | **1/*2*, **1/*3*, **1/*5* | 22 (43.1) | 3 | 19 | - |  |
| 2 | **1/*1* | 23 (45.1) | 0 | 23 | - |  |
| Others vs. 2 |  |  | 4 | 24 | 4.80 (0.52-44.15) | 0.204 |
| *Composite AS** | *CYP2D6*+*CYP2C19* |  |  |  | - | 0.211** |
| 1.5 | **2/*10+*2/*2, *5/*10+*1/*2,*  **2/*10+*2/*3* | 5 (9.8) | 1 | 5 | - |  |
| 2 | **5/*5+*1/*1,* (**1/*5* or **10/*10*+**1/*2*),  **1/*1*+**2/*2* | 8 (15.7) | 2 | 6 | - |  |
| 2.5 | (**1/*10* or **2/*10* or **2/*41*+**1/*2*),  (**1/*10* or **2/*10* or **2/*41*+**1/*3*),  **4/*10*+**1/*1* | 11 (21.6) | 1 | 9 | - |  |
| 3 | (**1/*5* or **10/*10* or **10/*41*+**1/*1*), (**1/*1* or **1/*2* or **2/*2*+**1/*2*), **2/*2*+**1/*3*, **1/*1*+**1/*5* | 14 (27.5) | 0 | 14 | - |  |
| 3.5 | **1/*10* or **2/*10* or **1/*41*+**1/*1* | 5 (9.8) | 0 | 5 | - |  |
| 4 | **1/*1* or **1/*2* or **2/*2*+**1/*1* | 8 (15.7) | 0 | 8 | - |  |
| Others vs. 4 |  |  | 4 | 39 | 1.13 (0.12-10.84) | 1.000 |
| 1.5+2+2.5 vs. others |  |  | 4 | 20 | 6.67 (0.72-61.40) | 0.090 |

**Notes:** *composite activity score (AS) of *CYP2D6* and *CYP2C19*. **overall *p*-value

**Table S4** Log-rank test of clinical data and drug metabolizing enzyme and transporter genes

| Variable factors | Log-rank Test | |
| --- | --- | --- |
|  | **Chi-square test** | ***p* value** |
| Gender | 0.240 | 0.624 |
| Age | 32.39 | 0.448 |
| *CYP1A2* data |  |  |
| genotyping data | 2.290 | 0.807 |
| g.-3860G>A | 1.400 | 0.496 |
| g.-163C>A | 0.280 | 0.869 |
| *CYP2B6* data |  |  |
| c.64C>T | 0.180 | 0.674 |
| c.516G>T | 1.230 | 0.541 |
| c.785A>G | 0.040 | 0.981 |
| *CYP2C9* data |  |  |
| genotyping data | 0.370 | 0.8314 |
| c.1075A>C | 0.370 | 0.8314 |
| *CYP2C19* data |  |  |
| genotyping data | 5.550 | 0.353 |
| c.636G>A | 0.470 | 0.492 |
| c.681G>A | 5.130 | 0.077 |
| c.681G>A_GG vs. AA | 5.40 | 0.020 |
| c.1297C>T | 0.090 | 0.769 |
| *CYP2D6* data |  |  |
| genotyping data | 7.710 | 0.808 |
| phenotypic data | 0.970 | 0.615 |
| activity score | 2.720 | 0.606 |
| Copy number variation (CNV) | 5.180 | 0.269 |
| CNV_2 copy vs. 1 copy | 7.330 | 0.007 |
| CNV_2 copy vs. 3 copy | 3.400 | 0.065 |
| g.100C>T | 0.630 | 0.730 |
| g.1846G>A | 0.090 | 0.767 |
| g.2850C>T | 0.920 | 0.630 |
| g.2988G>A | 0.600 | 0.440 |
| g.4180G>C | 1.070 | 0.584 |
| *CYP3A4* data |  |  |
| c.-392A>G | 0.180 | 0.674 |
| *CYP3A5* data |  |  |
| g.6986A>G | 1.940 | 0.380 |
| *COMT* data |  |  |
| c.322G>A | 1.740 | 0.420 |
| *SULT1A1* data |  |  |
| c.638G>A | 0.470 | 0.492 |
| *SULT4A1* data |  |  |
| *1113A>G | 2.470 | 0.291 |
| UGT2B7 data |  |  |
| c.-161C>T | 0.340 | 0.846 |
| c.211G>T | 0.370 | 0.543 |
| c.372A>G | 3.050 | 0.217 |
| c.802C>T | 0.340 | 0.846 |
| *ABCB1* data |  |  |
| c.1236C>T | 1.710 | 0.426 |
| c.2677G>T/A | 2.190 | 0.702 |
| c.3435C>T | 1.540 | 0.464 |
| *ABCA1* data |  |  |
| c.2649A>G | 0.510 | 0.776 |
| c.4760A>G | 0.490 | 0.783 |
| *ABCC2* data |  |  |
| c.-24C>T | 1.860 | 0.395 |
| c.3972C>T | 4.030 | 0.134 |
| g.68231A>G | 2.120 | 0.146 |
| *ABCC4* data |  |  |
| c.912C>A | 0.850 | 0.653 |
| c.2269G>A | 0.150 | 0.696 |
| *ABCG2* data |  |  |
| c.421C>A | 4.620 | 0.099 |
| *SLCO1B1* data |  |  |
| g.37041T>C | 2.400 | 0.121 |
| *SLC25A40* data |  |  |
| g.87868008C>G | 0.440 | 0.801 |
